# Supplementary material
Source: PubMed Central journal article supplement (PMC3791109)

**A**

## Supporting Figure S1

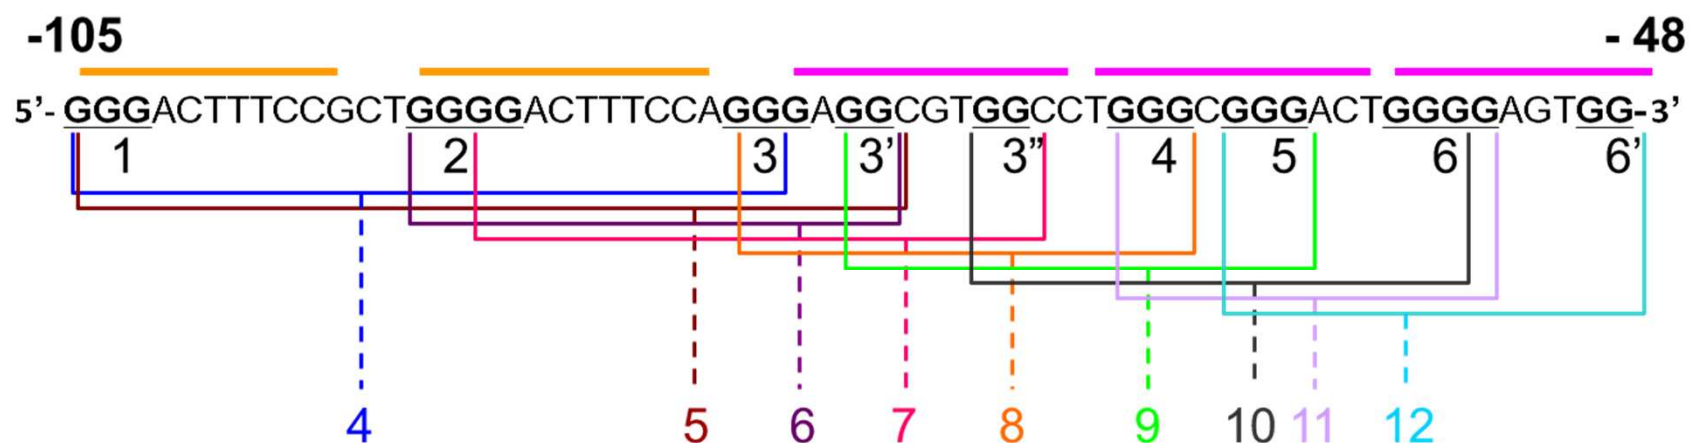**B**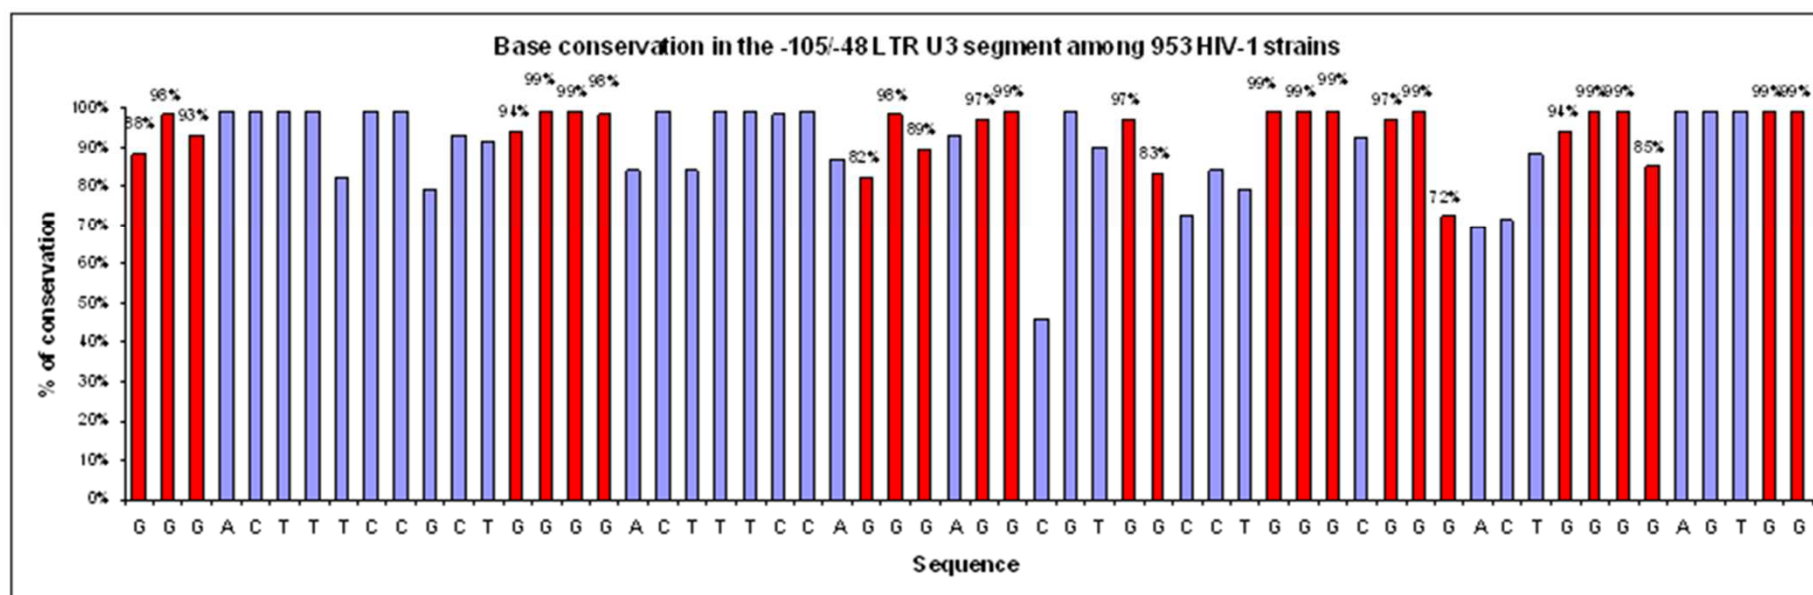

Supplement: NIHMS513606-supplement-2_si_002.pdf [file NIHMS513606-supplement-2_si_002.pdf]
